# Supplementary material
Source: PubMed Central journal article supplement (PMC122951)
Supplement: pnas_99_9_6346__9.pdf [file pnas_99_9_6346__9.pdf]

**Table 3. Autonomy of the *kal-1*-induced branching phenotype**

| Expression allele             | Cells examined                           | Branching |       | Control         |        |
|-------------------------------|------------------------------------------|-----------|-------|-----------------|--------|
| <i>otIs35 (ttx-3::kal-1)</i>  | AIY interneurons ( <i>ttx-3::gfp</i> )   | 100%      | (80)* | 8% <sup>†</sup> | (229)  |
|                               | AFD sens. neurons ( <i>gcy-8::gfp</i> )  | 0%        | (>50) | 0% <sup>‡</sup> | (>100) |
|                               | AWA sens. neurons ( <i>odr-10::gfp</i> ) | 0%        | (>50) | ND              |        |
|                               | AWC sens. neurons ( <i>str-2::gfp</i> )  | 7%        | (28)  | 0%              | 32     |
|                               | ASER sens. neuron ( <i>gcy-5::gfp</i> )  | 0%        | (>50) | 7%              | 59     |
| <i>otEx442 (gcy-8::kal-1)</i> | AFD sens. neurons ( <i>gcy-8::gfp</i> )  | 69%       | (36)  | 3% <sup>§</sup> | (39)   |
|                               | AIY interneurons ( <i>ttx-3::gfp</i> )   | 12%       | (44)  | 10%             | (94)   |
|                               | AWC sens. neurons ( <i>str-2::gfp</i> )  | 10%       | (41)  | 0%              | 32     |
|                               | ASER sens. neuron ( <i>gcy-5::gfp</i> )  | 10%       | (51)  | 7%              | 59     |

\*Numbers in parentheses denote the number of animals scored. sens., sensory; ND, not determined.

<sup>†</sup>Control numbers are obtained with the *ttx-3::kal-1ΔC* construct.

<sup>‡</sup>Control numbers are obtained with the *gfp* reporter lines alone except where noted otherwise.

<sup>§</sup>Control numbers are obtained with the *gcy-8::kal-1ΔC* construct.
