# Supplementary material
Source: PubMed Central journal article supplement (PMC122951)

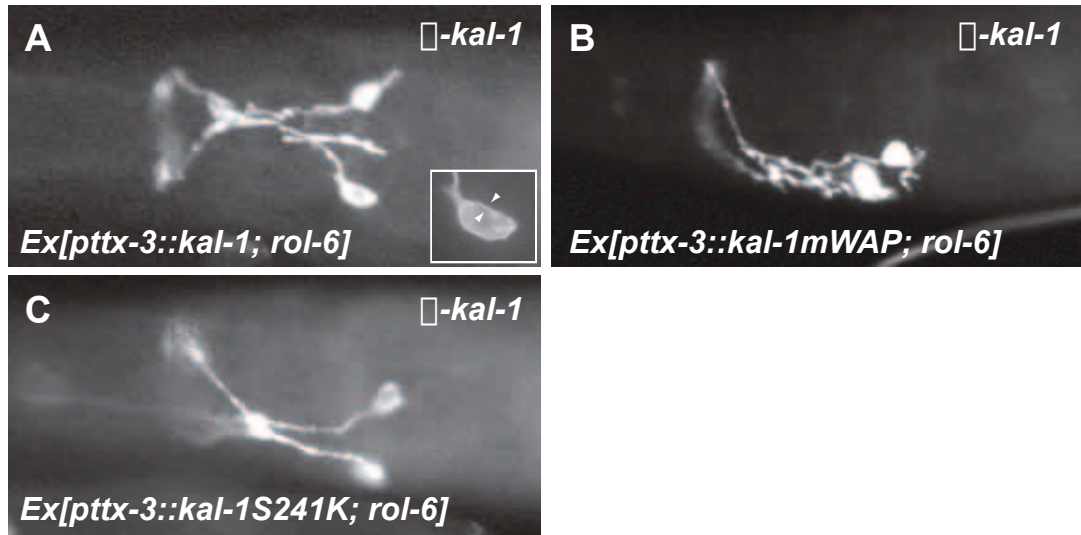

Supplement: pnas_99_9_6346__5.pdf [file pnas_99_9_6346__5.pdf]

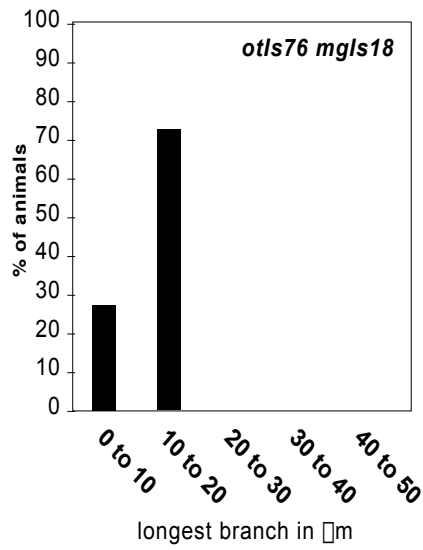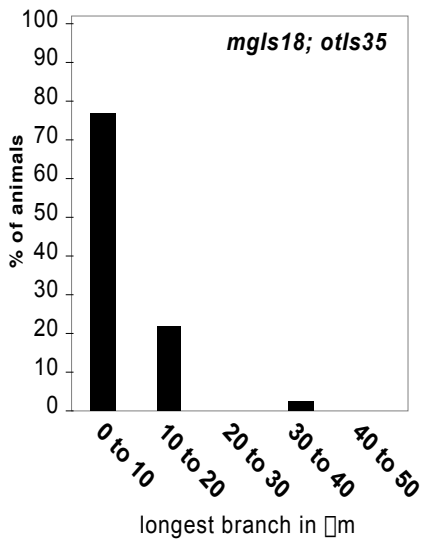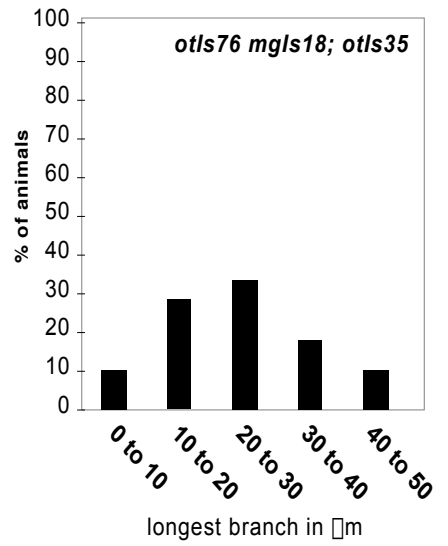

Supplement: pnas_99_9_6346__6.pdf [file pnas_99_9_6346__6.pdf]

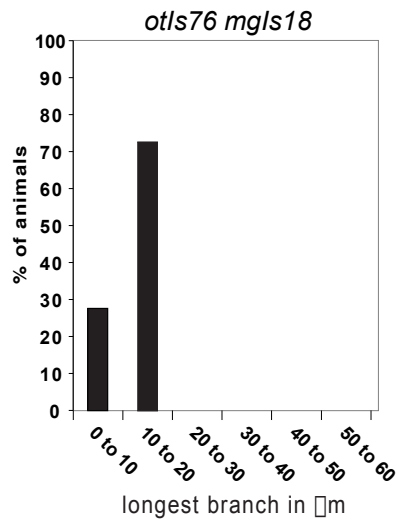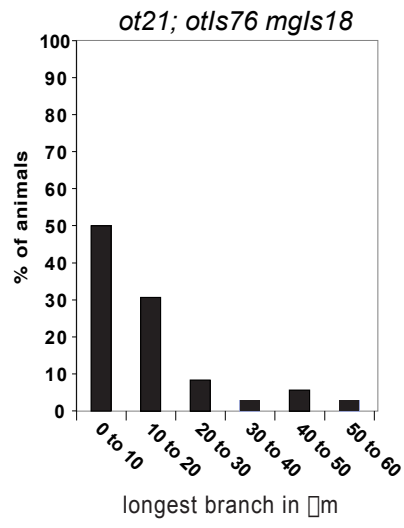

Supplement: pnas_99_9_6346__7.pdf [file pnas_99_9_6346__7.pdf]
